# Supplementary material for: Continuous production of iron oxide nanoparticles via fast and economical high temperature synthesis
Source: Royal Society of Chemistry journal article supplement (doi:10.1039/d0re00078g), 2020-01-01
Supplement: d0re00078g1.pdf [file d0re00078g1.pdf]

## Supporting Information

### Continuous Production of Iron Oxide Nanoparticles *via* Fast and Economical High Temperature Synthesis

Maximilian O. Besenhard,<sup>a</sup> Alec P. LaGrow,<sup>b</sup> Simone Famiani,<sup>b</sup> Martina Pucciarelli,<sup>a</sup> Paola Lettieri,<sup>a</sup> Nguyen T.K. Thanh,<sup>b,c,\*</sup> and Asterios Gavriilidis<sup>a,\*</sup>

<sup>a</sup> Department of Chemical Engineering, University College London, Torrington Place, London, WC1E 7JE, U. K.

<sup>b</sup> UCL Healthcare Biomagnetics Laboratories, University College London, 21 Albemarle Street, London W1S 4BS, U. K.

<sup>c</sup> Biophysics Group, Department of Physics and Astronomy, University College London, Gower Street, London, WC1E 6BT, U. K.

\*Corresponding authors' Emails: a.gavriilidis@ucl.ac.uk, ntk.thanh@ucl.ac.uk

#### Contents:

|                                                                     |           |
|---------------------------------------------------------------------|-----------|
| <b>SI 1: LIST OF CHEMICALS USED</b>                                 | <b>2</b>  |
| <b>SI 2: REACTOR FOR CONTINUOUS THERMAL DECOMPOSITION SYNTHESIS</b> | <b>3</b>  |
| SI 2.1: Details of reactor set-up                                   | 3         |
| SI 2.2: Feed stability study                                        | 3         |
| SI 2.3: Reactor cleaning studies                                    | 4         |
| <b>SI 3: SAXS STUDIES</b>                                           | <b>6</b>  |
| <b>SI 4: UV-VIS STUDIES</b>                                         | <b>7</b>  |
| <b>SI 5: TEM STUDIES</b>                                            | <b>8</b>  |
| <b>SI 6: BATCH STUDY</b>                                            | <b>10</b> |
| <b>SI 7: PRESSURE PUMP RECORDINGS</b>                               | <b>11</b> |
| <b>SI 8: COST ANALYSIS</b>                                          | <b>12</b> |
| SI 8.1: Chemicals                                                   | 12        |
| SI 8.2: Reactor equipment                                           | 13        |
| SI 8.3: Energy and labour                                           | 14        |

## SI 1: LIST OF CHEMICALS USED

All chemicals used for this work are listed in Table S1.

**Table S1: Details of chemicals used**

| Compound               | Purchased from   | Manufacturer                | Lot Nr.   | Purity                          |
|------------------------|------------------|-----------------------------|-----------|---------------------------------|
| Ferric acetylacetonate | Sigma Aldrich UK | Aldrich(517003)             | MKBT5618V | 97%                             |
| Oleylamine             | Sigma Aldrich UK | Aldrich (07805)             | STBG8339  | Technical grade, 70%            |
| 1-Octadecene           | Sigma Aldrich UK | Aldrich (0806)              | SHBJ3034  | Technical grade, 90%            |
| Isopropyl alcohol      | Sigma Aldrich UK | Fischer Scientific (P/7500) | 1849784   | Certified AR for analysis, >95% |

## SI 2: REACTOR FOR CONTINUOUS THERMAL DECOMPOSITION SYNTHESIS

### SI 2.1: Details of reactor set-up

Pictures of the reactor system used are shown in Figure S1. A picture of the flow meter in its customised heater is shown in Figure S2a. In order to calibrate the flow meter heated to 50 °C, 1-octadecene was pumped through the flow meter using a syringe pump (Legato210 KD Scientific, USA) at different flow rates while recording the flow meter readout. The set and measured flow rates, as well as the obtained calibration curve are shown in Figure 2b.

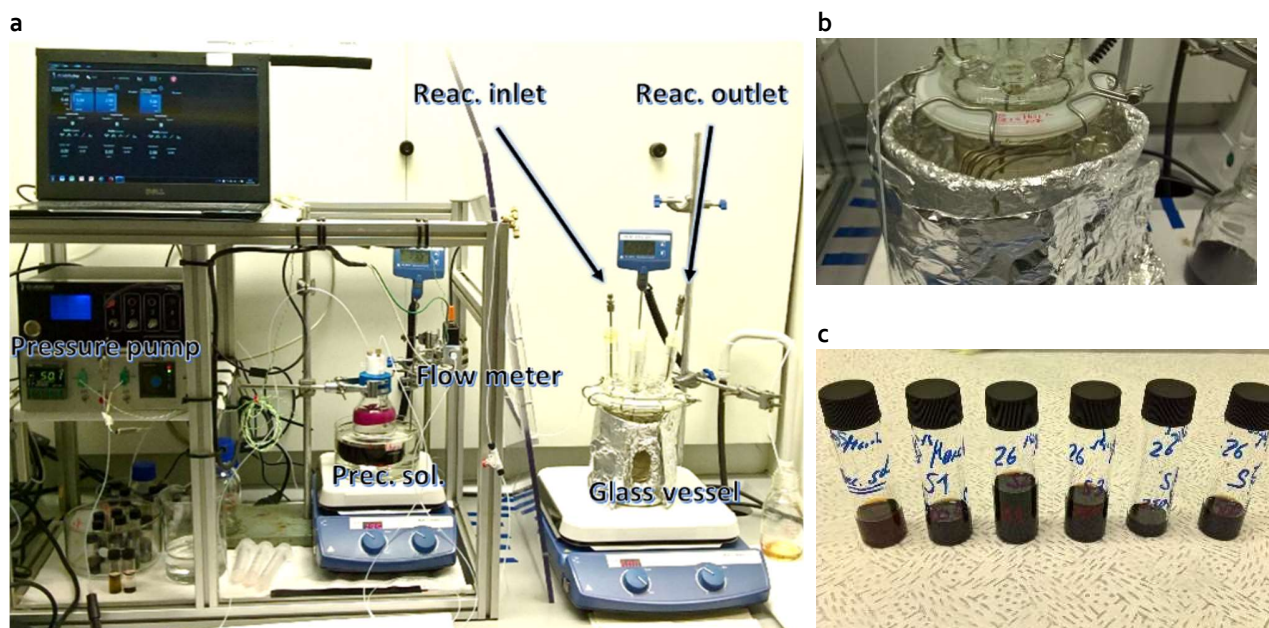

**Figure S1:** Pictures of the reactor set-up used for continuous synthesis of IONPs by thermal decomposition. (a) Overview; (b) Tubular reactor in the heated glass vessel with insulation; (c) Collected samples after synthesis at 250 °C.

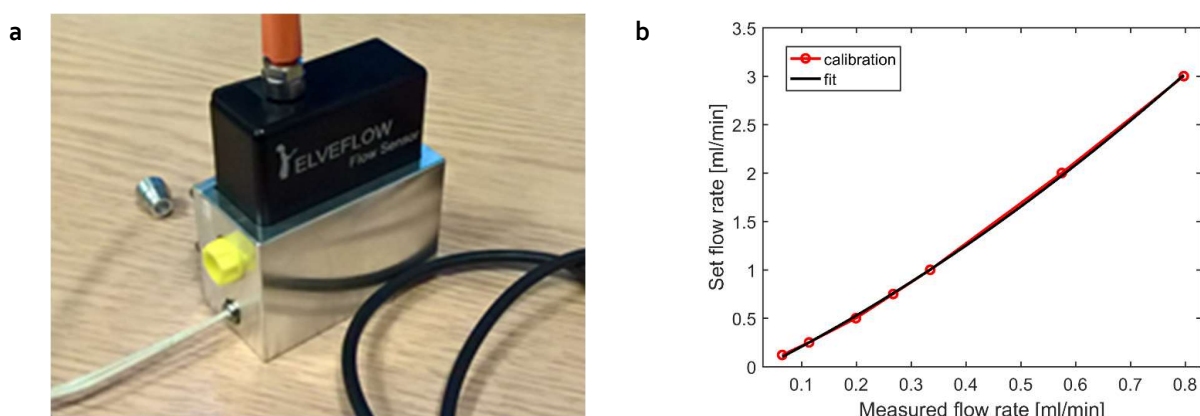

**Figure S2:** (a) Customised heater for flow meter, *i.e.*, aluminium frame heated via cartridge heater. (b) Set and measured flow rates of 1-octadecene with the flow meter heated to 50 °C used for calibration.

### SI 2.2: Feed stability study

In order to study if the feed solution remains stable during the process (*i.e.*, no precipitation in the connection between the heated precursor solution reservoir and the heated tubular reactor, and no fluctuations in feed precursor concentration), samples

were collected over a period of 1.5 h just before the precursor solution entered the reactor. These samples were then analysed via UV-Vis spectroscopy, as described in the Materials and Methods section. These results, as well as the pressure profile during this study are shown in Figure S3. Figure S4 shows the collected samples.

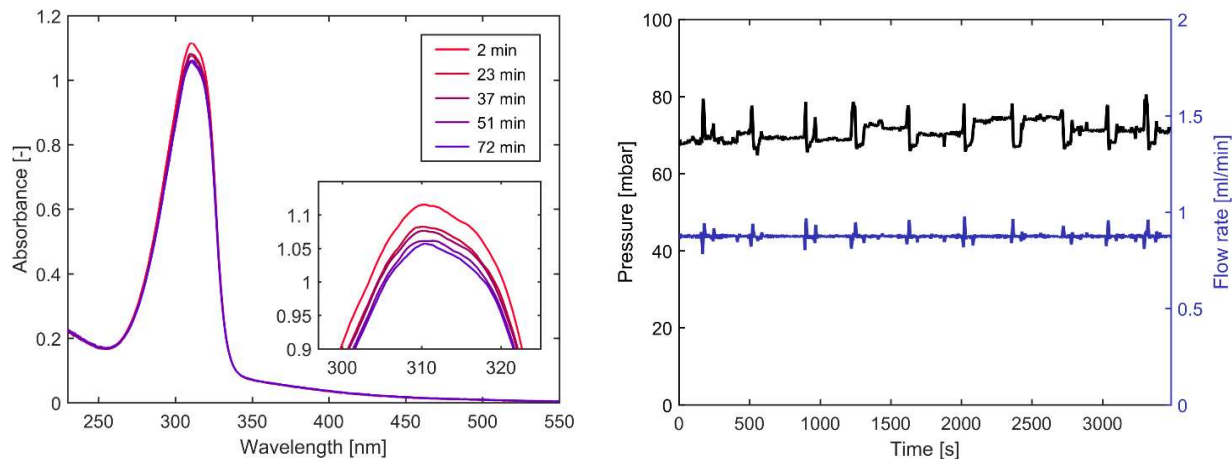

**Figure S3:** (left) Absorption spectra of feed samples collected before entering the reactor at various operation times. (right) pressure pump readout (applied pressure and measured flow rate) when setting the flow rate to 0.85 ml/min. The fluctuations in pressure approx. every 5 min originate from sampling, *i.e.*, lifting the tube connected to the reactor outlet to collect sample in vials. The pressure remained very low during this study demonstrating absence of precipitation in the connection tubing.

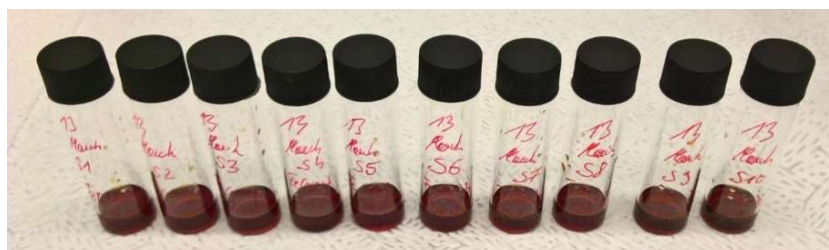

**Figure S4:** Samples collected during the feed stability study

### SI 2.3: Reactor cleaning studies

After each operation, the tubular reactor was cleaned simply by pushing air through it with a syringe connected to the inlet. Once cooled to room temperature, the reactor was flushed with a nonpolar solvent first (twice with 1-octadecene) and then with isopropyl alcohol. This was followed by a rinse with DI water, always ~20 ml each, and purging with air. Afterwards, the reactor was rinsed with a HCl solution (~15%) to dissolve possible ferrous residuals. The effluent of the 1<sup>st</sup> 1-octadecene cleaning after operation was always brownish. This is because this effluent contained IONP solution residuals that remained in the reactor after terminating the operation and purging the reactor with air. The described purging with air after each operation was not enough to completely remove the processed solution from the reactor. Therefore, the cleaning procedure (after the reactor reached room temperature) started with the 1-octadecene rinses. However, iron containing residuals adhering to the reactor wall would not have been removed during this or the following flushing(s), but dissolved when rinsing the reactor with the HCl solution and coloured the effluent. The collection of this HCl solution (*i.e.*, all HCl solution that was passed through the reactor), did not show any change in colour (see Figure S5), indicating the absence of iron containing residuals growing on the reactor wall. It is worth mentioning that the effluent of the HCl flushing was brownish when testing the reactor for other high temperature synthesis of IONPs using different solvents (results not shown here).

Effluent of 1<sup>st</sup> 1-octadecene cleaning  
after operation at 290 °C

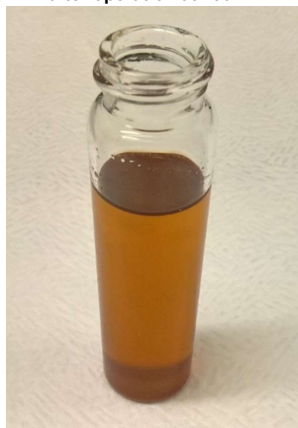

Effluent of 2<sup>nd</sup> 1-octadecene cleaning  
after operation at 290 °C

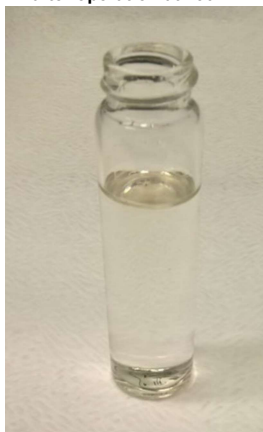

Effluent of isopropyl alcohol cleaning  
after operation at 290 °C

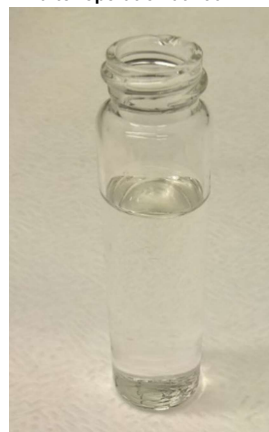

Effluent of HCl cleaning  
after operation at 250 °C

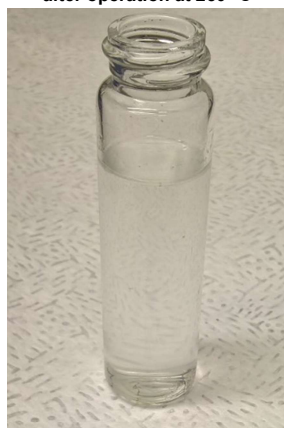

Effluent of HCl cleaning  
after operation at 270 °C

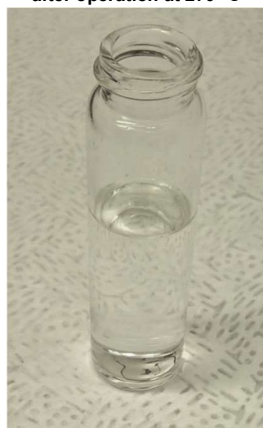

Effluent of HCl cleaning  
after operation at 290 °C

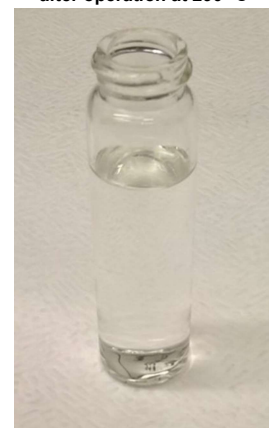

**Figure S5:** Effluent of the cleaning, *i.e.*, solutions collected after rinsing the reactor. The first row corresponds to the cleaning chronology which was followed by a HCl rinse. The effluent of the HCl cleaning step after operating at the different temperatures are shown in the bottom row.

### SI 3: SAXS STUDIES

For the background correction of SAXS curves, a spectrum of 1-octadecene recorded using an identical capillary was used as background. The background was subtracted from each sample spectra after merging the spectra (background and sample) for scattering vectors of  $q > 2 \text{ nm}^{-1}$ . The radius of gyration  $R_g$  was determined via the Guinier approximation for globular particles (equation S1) by a straight-line fit (equation S2) within a  $q$  range of  $q^2 = 0.06 - 0.45 \text{ nm}^{-2}$  for all spectra.

$$I(q) = I(0) \cdot \exp(-q^2 \cdot R_g^2/3) \quad \text{S1}$$

$$\ln(I(q)) = \ln(I(0)) - q^2 \cdot (R_g^2/3) \quad \text{S2}$$

The particle diameter obtained *via* SAXS analysis was determined assuming spherical particles, *i.e.*, using the definition of the radius of gyration of a sphere with the radius  $R_{sphere}$ , (equation S3).

$$D_{sphere}(SAXS) \equiv 2 \cdot R_{sphere} = 2 \cdot \sqrt{5/3} \cdot R_g \quad \text{S3}$$

The analysis was executed in ATSAS version 2.8 (Franke, D., et al., *J. Appl. Cryst.* 50, 1212-1225).

#### SI 4: UV-VIS STUDIES

Due to the strong absorbance of  $\text{Fe}(\text{acac})_3$ , the precursor solution (0.0073 g/ml) had to be diluted to maintain the linearity according to the Beer-Lambert law, *i.e.*, allowing for precursor concentration determination from absorbance measurements. To determine for which  $\text{Fe}(\text{acac})_3$  concentrations linearity is maintained, UV-Vis spectra of IPA solutions with decreasing  $\text{Fe}(\text{acac})_3$  concentrations were recorded. Based on these results (see top of Figure S6), a 1/750 dilution with IPA was chosen for the  $\text{Fe}(\text{acac})_3$  concentration determination.

A picture of the precursor solution and its 1/750 dilution achieved by adding 0.08 ml to 60 ml IPA is shown in Figure S7. The UV-Vis spectrum of the precursor solution after heating (see bottom of Figure S6) was different than the spectra of the initially prepared  $\text{Fe}(\text{acac})_3$  IPA solutions. Still, the maximum absorbance values were similar, showing that the linear regime is still maintained. For all studied precursor and IONP solutions, the wavelength of the maximum absorption used to obtain the conversion was between 310 and 315 nm.

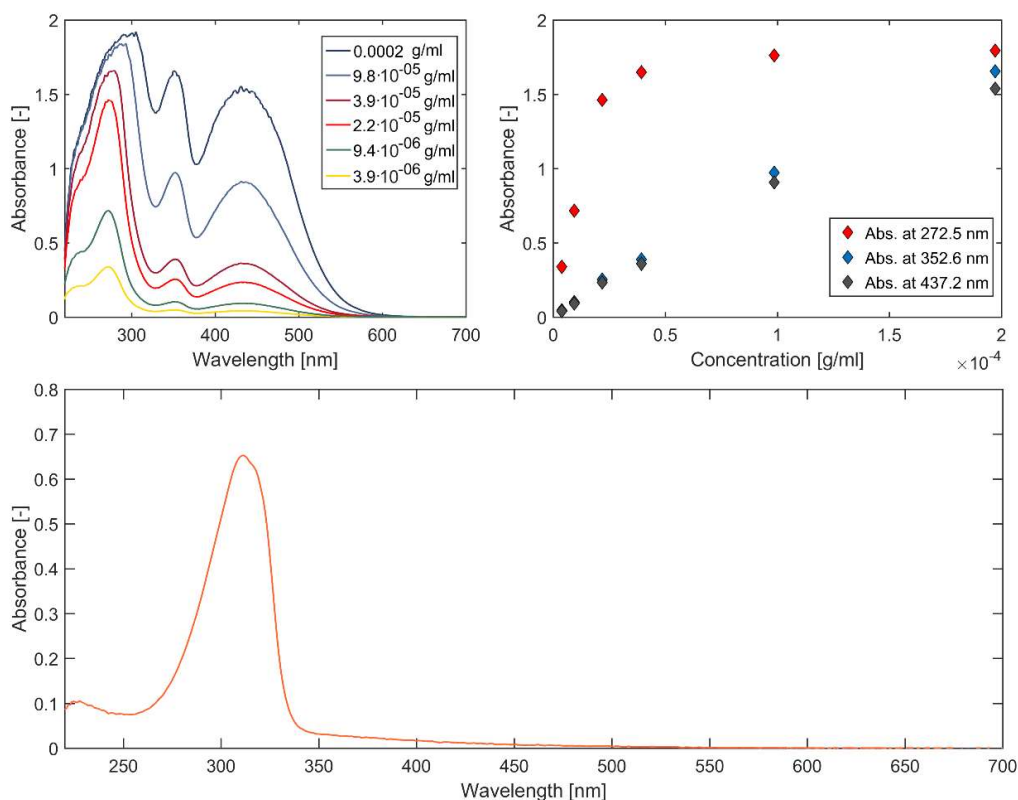

**Figure S6:** Absorption spectra of (top, *left*)  $\text{Fe}(\text{acac})_3$  (as received) dissolved in IPA, (top, *right*) absorbance of the three characteristic peaks vs.  $\text{Fe}(\text{acac})_3$  concentration, (bottom) absorption spectra of precursor solution after heating to 120 °C for > 30 min 1/750 diluted with IPA.

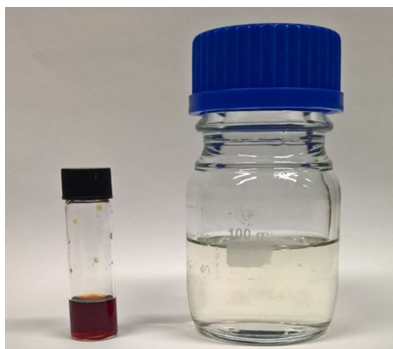

**Figure S7:** Sample of precursor solution (*left*) and 1/750 diluted precursor solution (0.08 ml precursor solution added to 60 ml IPA) as used for UV-Vis studies (*right*).



## SI 5: TEM STUDIES

As part of the TEM analysis electron diffraction profiles of the samples shown in Figure 5 and Figure 8 were recorded (see Figure S8a). Radially averaging the diffraction profiles confirmed that the synthesised IONPs were of the inverse spinel structure of magnetite (see Figure S8b). The particle size histograms of the samples in Figure 5 and Figure 8 are shown in Figure S9 and Figure S10.

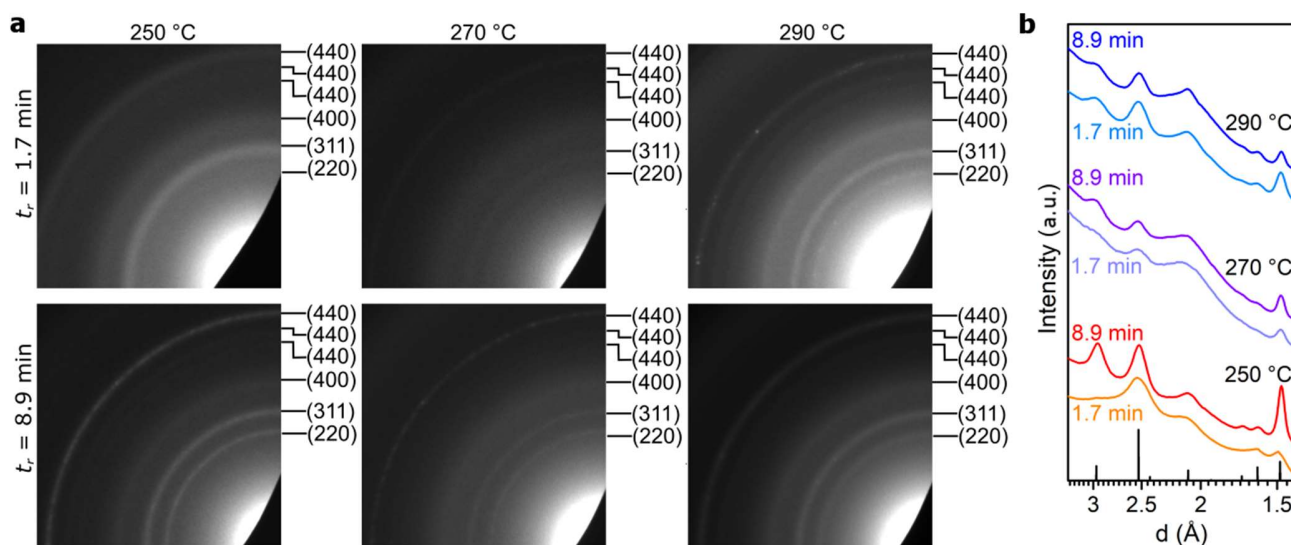

**Figure S8:** (a) Electron diffraction patterns recorded *via* TEM for samples synthesised at 250 °C, 270 °C and 290 °C using the shortest and longest residence time, *i.e.*,  $t_r = 1.7$  min and  $t_r = 8.9$  min, with indexing of the  $hkl$  values corresponding to magnetite. (b) Radially averaged diffraction profiles and the corresponding pattern for magnetite shown by the black bars at the bottom (magnetite PDF ref. 03-065-3107).

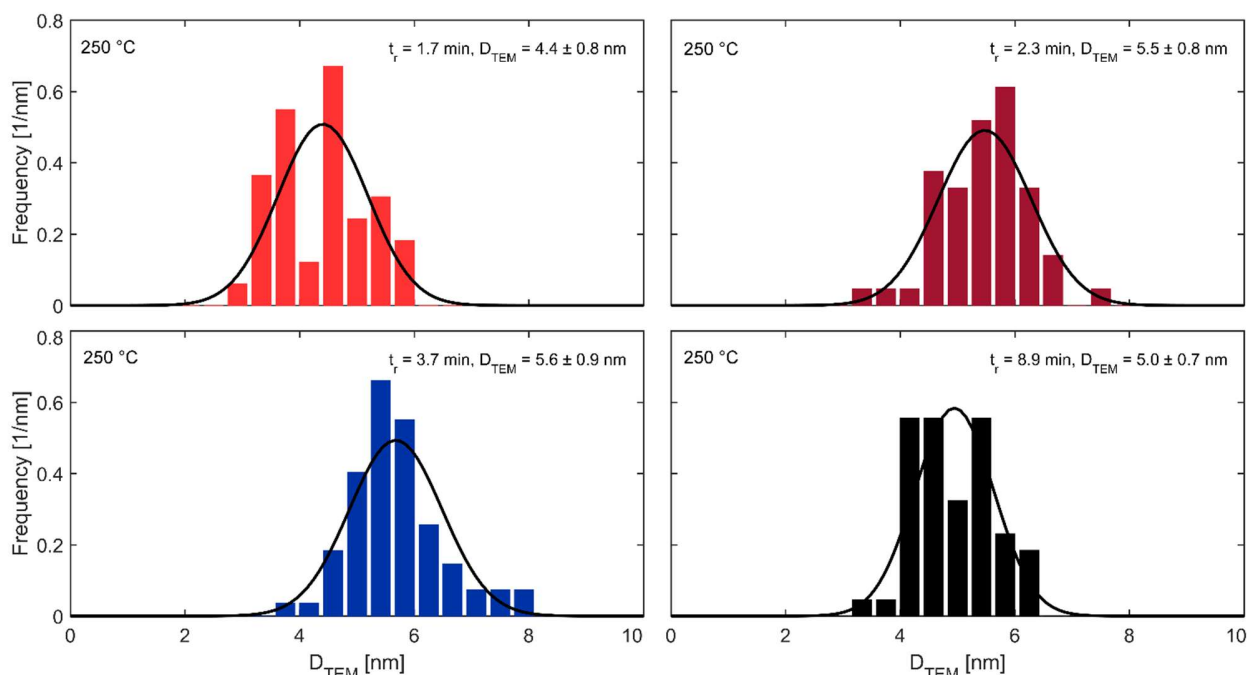

**Figure S9:** Histograms (*bars*) of particle sizes obtained from TEM images of IONPs synthesised at 250 °C (see Figure 5) and the normal distributions (*solid line*) generated using the mean particle size and the particle size standard deviation.



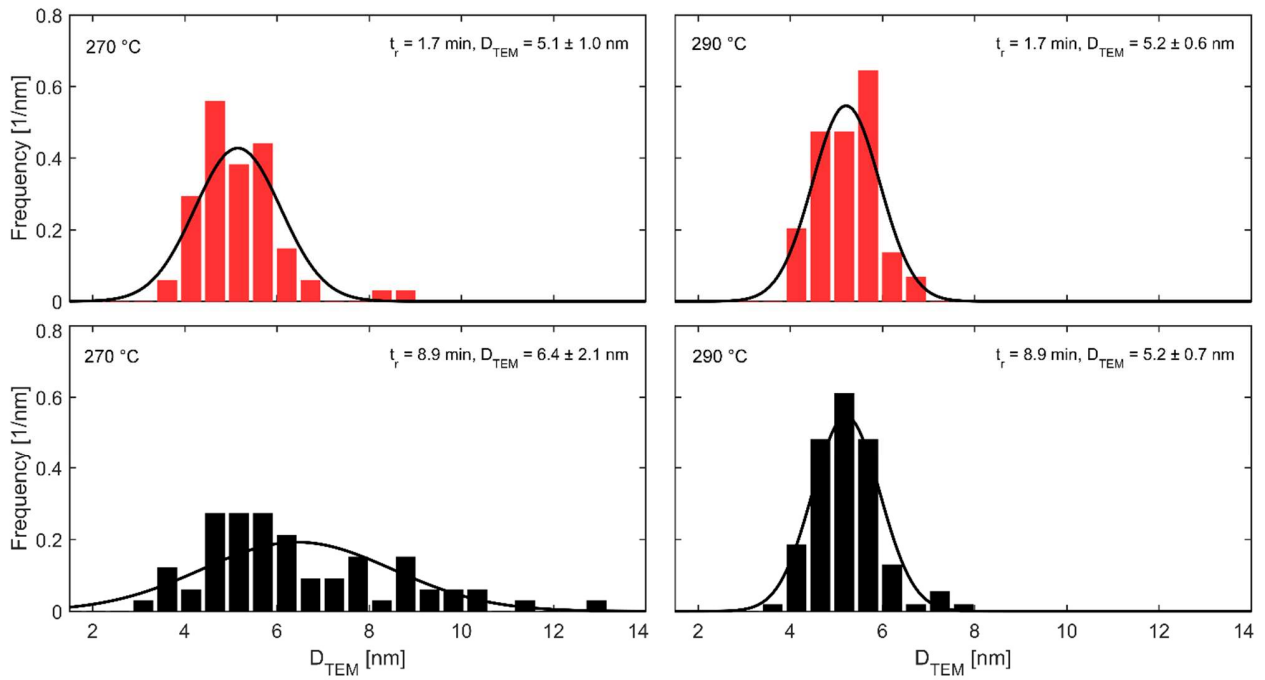

**Figure S10:** Histograms (*bars*) of particle sizes obtained from TEM images of IONPs synthesised at 270 °C and 290 °C (see Figure 8) and the normal distributions (*solid line*) generated using the mean particle size and the particle size standard deviation.

## SI 6: BATCH STUDY

The IONP batch synthesis was performed using a 50 ml round bottom flask connected to a Schlenk line system. Similar to the reaction conditions of the flow reactor, 6.6 ml of oleylamine and 13.3 ml of 1-octadecene were used as solvent (20 ml in total) and 146 mg of  $\text{Fe}(\text{acac})_3$  (0.41 mmol) were added to the solution. This precursor solution was heated in a round bottom flask to 120 °C under  $\text{N}_2$  flow and left for 30 min at this temperature. Subsequently the solution was heated up at 270 °C and left at this temperature for 10 min. Aliquots were taken from the solution at different stages of reaction: at 120 °C (precursor solution) and at 270 °C after 5 and 10 min at this temperature. The solution was cooled to room temperature by removing the heating mantle. After each experiment the glassware was rinsed with *aqua regia* (HCl:  $\text{HNO}_3$  mixture) to remove any residuals and was washed with abundant water to rinse away the *aqua regia*. The absorption spectra of samples (recorded as described in the Materials and Methods section) withdrawn before (= precursor sol), during (= 5 and 10 min) and after the batch (= final) synthesis are shown in Figure S11.

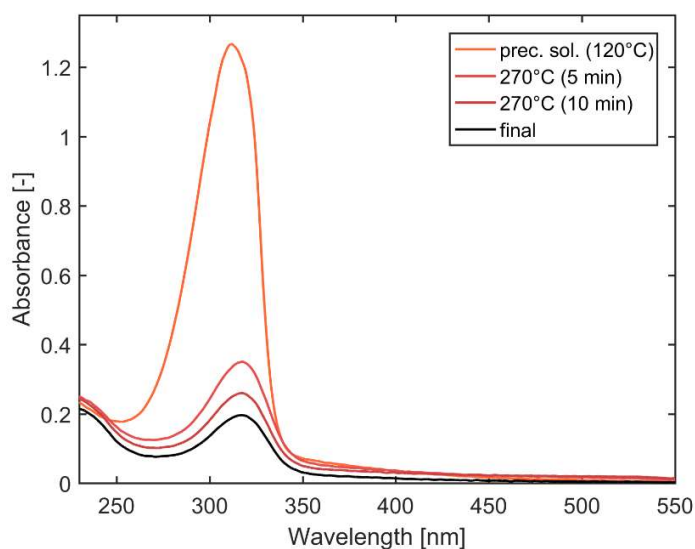

**Figure S11:** Absorption spectra of IONP solutions synthesised at 270 °C in a batch process.

Based on the absorption spectra of samples withdrawn from the batch reactor it was confirmed that the reaction did not need long operating times. Most of the precursor was converted before reaching the final reaction temperature (*i.e.*, at undefined temperatures) based on a comparison of the spectra of the precursor solution and the 5 min sample. However, a slight increase of conversion at the final reaction temperature is indicated by a decrease in characteristic absorbance peak between 310 and 315 nm comparing the samples withdrawn after 5 and 10 min, and after the batch synthesis. From the maximum absorbance of the final sample a conversion of 80% was obtained for the batch synthesis.

## SI 7: PRESSURE PUMP RECORDINGS

The pressure and flow rate measured during the operation at 250 °C is shown in Figure 2. The pressure and flow rate measured during operations at 270 °C and 290 °C are shown in Figure S12 and Figure S13.

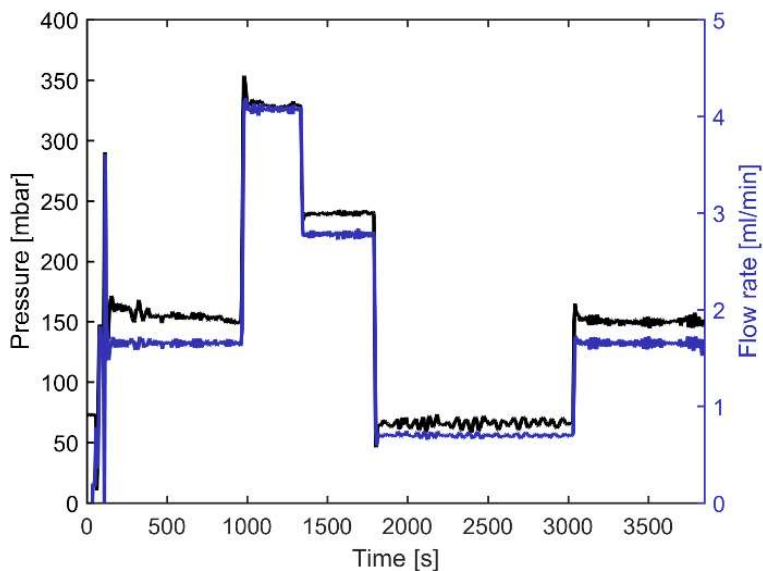

**Figure S12:** Measured pressure and flow rate during the flow experiment at 270 °C, while changing flow rates.

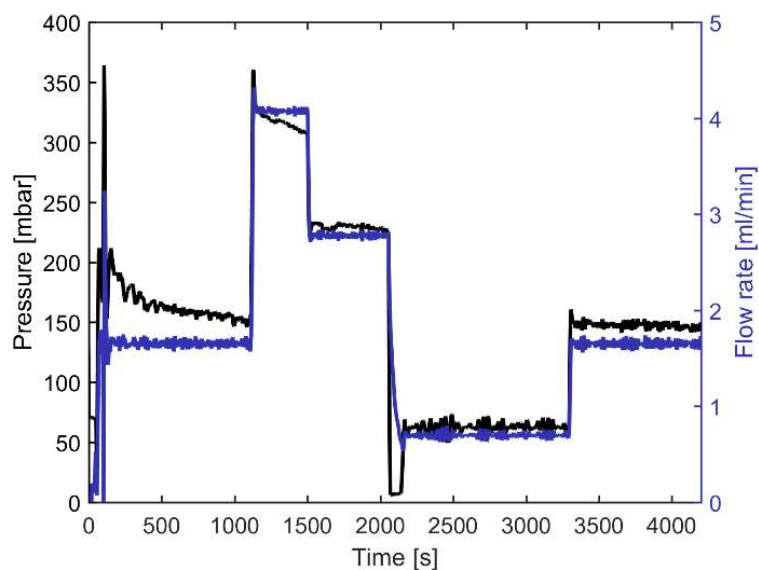

**Figure S13:** Measured pressure and flow rate during the flow experiment at 290 °C, while changing flow rates.

## SI 8: COST ANALYSIS

### SI 8.1: Chemicals

**Table S2:** Price list of the chemicals used to calculate costs for production in the batch and flow system (prices obtained August 2019).

| Compound               | Identified supplier | Quantity | Info                            | Price   |
|------------------------|---------------------|----------|---------------------------------|---------|
| Ferric acetylacetonate | Fisher Scientific   | 1 kg     | 99%                             | 208 GBP |
| Oleylamine             | Fisher Scientific   | 5 l      | Technical grade 96%             | 523 GBP |
| Octadecene             | Fisher Scientific   | 2.5 l    | Technical grade 90%             | 64 GBP  |
| Isopropyl alcohol      | Sigma-Aldrich       | 8 kg     | Used in the cleaning phase      | 96 GBP  |
| Hydrochloric acid      | Fisher Scientific   | 25 l     | 37%, used in the cleaning phase | 290 GBP |
| Acetone                | Alfa Aesar          | 2.5 l    | Used in the cleaning phase      | 21 GBP  |
| Nitric acid            | Sigma-Aldrich       | 1 l      | Used in the cleaning phase      | 24 GBP  |

**Table S3:** Breakdown of costs for chemicals for the production of 60 ml IONP solution in batch.

| Compound               | Quantity/60 ml | Price/unit                    | Price/60 ml                | Total    |
|------------------------|----------------|-------------------------------|----------------------------|----------|
| Ferric acetylacetonate | 0.44 g         | 0.21 GBP/g                    | 0.09 GBP                   | 8.23 GBP |
| Oleylamine             | 20.00 ml       | 0.10 GBP/ml                   | 2.09 GBP                   |          |
| Octadecene             | 40.00 ml       | 0.03 GBP/ml                   | 1.02 GBP                   |          |
| Hydrochloric acid      | 112.50 ml      | 0.01 GBP/ml                   | 1.31 GBP                   |          |
| Nitric acid            | 37.50 ml       | 0.02 GBP/ml                   | 0.89 GBP                   |          |
| Water                  | 270.00 ml      | $1.77 \times 10^{-05}$ GBP/ml | $4.77 \times 10^{-03}$ GBP |          |
| DI water               | 270.00 ml      | $2.00 \times 10^{-03}$ GBP/ml | 0.54 GBP                   |          |
| Acetone                | 270.00 ml      | 0.01 GBP/ml                   | 2.28 GBP                   |          |

**Note 1:** The values per 60 ml might not match exactly the listed quantity and price due to round-off errors

**Note 2:** For the cleaning of the glassware including the flask a quantity of 150 ml of *aqua regia* (assuming a quantity of 50 ml for each of the three 20 ml batches to produce 60 ml IONP solution) was assumed together with 150 ml of DI water and acetone.

**Table S4:** Breakdown of costs for chemicals for the production of 60 ml IONP solution using the flow reactor (operated at 0.7 ml/min).

| Compound               | Quantity/60 ml | Price/unit                    | Price/60 ml                | Total    |
|------------------------|----------------|-------------------------------|----------------------------|----------|
| Ferric acetylacetonate | 0.44 g         | 0.21 GBP/g                    | 0.09 GBP                   | 3.28 GBP |
| Oleylamine             | 20.00 ml       | 0.10 GBP/ml                   | 2.09 GBP                   |          |
| Octadecene             | 40.00 ml       | 0.03 GBP/ml                   | 1.02 GBP                   |          |
| Octadecene (cleaning)  | 1.27 ml        | 0.03 GBP/ml                   | 0.04 GBP                   |          |
| Isopropyl alcohol      | 1.27 ml        | 0.02 GBP/ml                   | 0.02 GBP                   |          |
| DI water               | 1.27 ml        | $2.00 \times 10^{-03}$ GBP/ml | $2.00 \times 10^{-03}$ GBP |          |
| Hydrochloric acid      | 1.27 ml        | 0.01 GBP/ml                   | 0.01 GBP                   |          |

**Note:** The values per 60 ml might not match exactly the listed quantity and price due to round-off errors

## SI 8.2: Reactor equipment

**Table S5:** Price list of the equipment (including heat transfer fluid) used to calculate costs for production in the batch and flow system.

| Reactor equipment            | Quantity | Price    | Assumed lifetime |
|------------------------------|----------|----------|------------------|
| Oil bath vessel              | 1 unit   | 70 GBP   | 2 years          |
| Heat transfer fluid          | 1 l      | 6 GBP    | 4 months         |
| Glassware                    | 10 units | 30 GBP   | 3 years          |
| Coated metal tubing          | 2 m      | 300 GBP  | 1 year           |
| Stirring hotplate (500 W)    | 1 unit   | 500 GBP  | 5 years          |
| Stirring hotplate (1500 W)   | 1 unit   | 800 GBP  | 5 years          |
| Pressure pump and flow meter | 1 unit   | 3500 GBP | 2 years          |
| Schlenk line system          | 1 unit   | 1500 GBP | 10 years         |

**Note:** Prices are representative values for the required type of equipment.

**Table S6:** Breakdown of costs for reactor equipment for the production of 60 ml IONP solution in batch.

| Element             | Quantity/60 ml              | Price/unit                    | Price/60 ml | Total    |
|---------------------|-----------------------------|-------------------------------|-------------|----------|
| Heat transfer fluid | 17.31 mL                    | $6.00 \times 10^{-03}$ GBP/ml | 0.10 GBP    | 2.01 GBP |
| Oil bath vessel     | $2.02 \times 10^{-03}$ unit | 70.00 GBP/unit                | 0.14 GBP    |          |
| Glassware           | $4.03 \times 10^{-03}$ unit | 2.98 GBP/unit                 | 0.01 GBP    |          |
| Stirring hotplate   | 0.002 unit                  | 714.00 GBP/unit               | 1.15 GBP    |          |
| Schlenk line system | $4.03 \times 10^{-04}$ unit | 1500.00 GBP/unit              | 0.60 GBP    |          |

**Note 1:** The values per 60 ml might not match exactly the listed quantity and price due to round-off errors

**Note 2:** Costs for the equipment were estimated based on the assumed lifetime of each element and the assumed annual working days, *i.e.*, 248 days (8 h working time each). An example for the price per unit estimation is shown at the end of this section.

**Table S7:** Breakdown of costs for reactor equipment for the production of 60 ml IONP solution using the flow reactor (operated at 0.7 ml/min).

| Component                    | Quantity/60 ml              | Price/unit       | Price/60 ml | Total    |
|------------------------------|-----------------------------|------------------|-------------|----------|
| Heat transfer fluid          | 3.53 ml                     | 6.00E-03 GBP/ml  | 0.02 GMP    | 1.95 GBP |
| Oil bath vessel              | $8.23 \times 10^{-04}$ unit | 70.00 GBP/l      | 0.06 GMP    |          |
| Glassware                    | $5.49 \times 10^{-04}$ unit | 2.98 GBP/unit    | 0.002 GMP   |          |
| Coated metal tubing          | $8.23 \times 10^{-04}$ unit | 293.30 GBP/unit  | 0.24 GMP    |          |
| Stirring hotplate            | $3.29 \times 10^{-04}$ unit | 1300.00 GBP/unit | 0.20 GMP    |          |
| Pressure pump and flow meter | $4.11 \times 10^{-04}$ unit | 3500.00 GBP/unit | 1.43 GMP    |          |

**Note:** The values per 60 ml might not match exactly the listed quantity and price due to round-off errors

**Example price per unit estimation:** For the batch system, we use one oil bath vessel with a lifetime of 2 years. Therefore, its daily usage is: 1 unit for  $2 \times 248$  days, giving  $2.02 \times 10^{-03}$  unit/d (=  $2.02 \times 10^{-03}$  per 60 ml which was the assumed production volume for one day). For the flow system two oil bath vessels were used, each with a lifetime of 2 years: 2 units for  $2 \times 248$  days, giving  $4.03 \times 10^{-03}$  unit/d. As the flow system produced 294 ml/d, the  $4.03 \times 10^{-03}$  unit/d were scaled to match the production of 60 ml by multiplying with 60/294 ml/ml giving  $8.23 \times 10^{-04}$  per 60 ml produced in flow.

### SI 8.3: Energy and labour

**Table S8:** Energy and labour for the production of 60 ml IONP solution in batch.

|        |            | Quantity/60 ml | Price/unit    | Price/60 ml (= Total) |
|--------|------------|----------------|---------------|-----------------------|
| Energy | Heating    | 4.90 kWh       | 0.11 GBP/unit | 0.54 GMP              |
| Labour | Technician | 8 h            | 30.38 GBP/h   | 243.00 GMP            |

**Note:** The values per 60 ml might not match exactly the listed quantity and price due to round-off errors

**Table S9:** Energy and labour costs for the production of 60 ml IONP using the flow reactor (operated at 0.7 ml/min).

|        |            | Quantity/60 ml | Price/unit   | Price/60 ml (= Total) |
|--------|------------|----------------|--------------|-----------------------|
| Energy | Heating    | 4.01 kWh       | 0.11 GBP/kWh | 0.44 GMP              |
| Labour | Technician | 1.63 h         | 30.38 GBP/h  | 49.59 GMP             |

**Note 1:** The values per 60 ml might not match exactly the listed quantity and price due to round-off errors

**Note 2:** The required hours of the technician to produce 60 ml were calculated based on the 294 ml produced per day, *i.e.*, during an 8 h shift.

**Note 3:** Energy costs assigned to pumping were estimated to be  $3.00 \times 10^{-03}$  GBP (for 60 ml), hence negligible.
